# Supplementary material for: Identification of a mitofusin specificity region that confers unique activities to Mfn1 and Mfn2
Source: PubMed Central journal article supplement — Mol Biol Cell. 2019 Aug 1;30(17):2309–19. doi: 10.1091/mbc.E19-05-0291 (PMC6743458; doi:10.1091/mbc.e19-05-0291), 2019-08-01
Supplement: mbc-30-2309-s001.pdf [file mbc-30-2309-s001.pdf]

# Supplemental Materials

*Molecular Biology of the Cell*

Sloat et al.

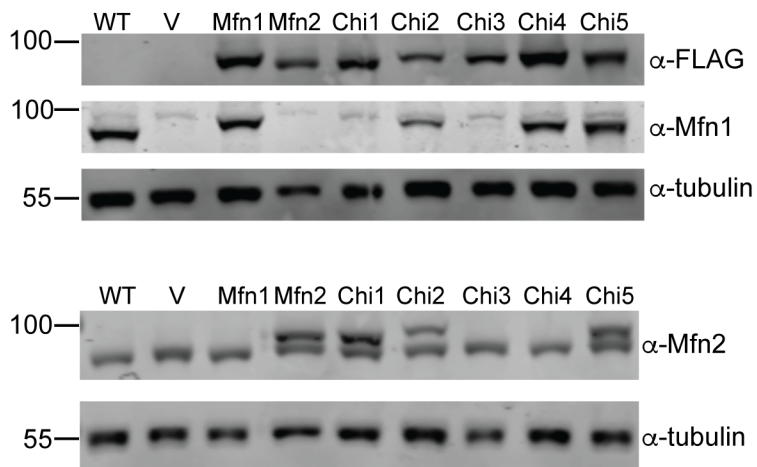

**Figure S1**

**Mitofusin-FLAG protein expression in clonal populations of Mfn1-null cells.**

Whole cell lysates prepared from the indicated cell lines were subjected to SDS-PAGE and immunoblotting with the indicated antibody. The Mfn1 epitope is amino acids 350-580 and the Mfn2 epitope is amino acids 661-757.

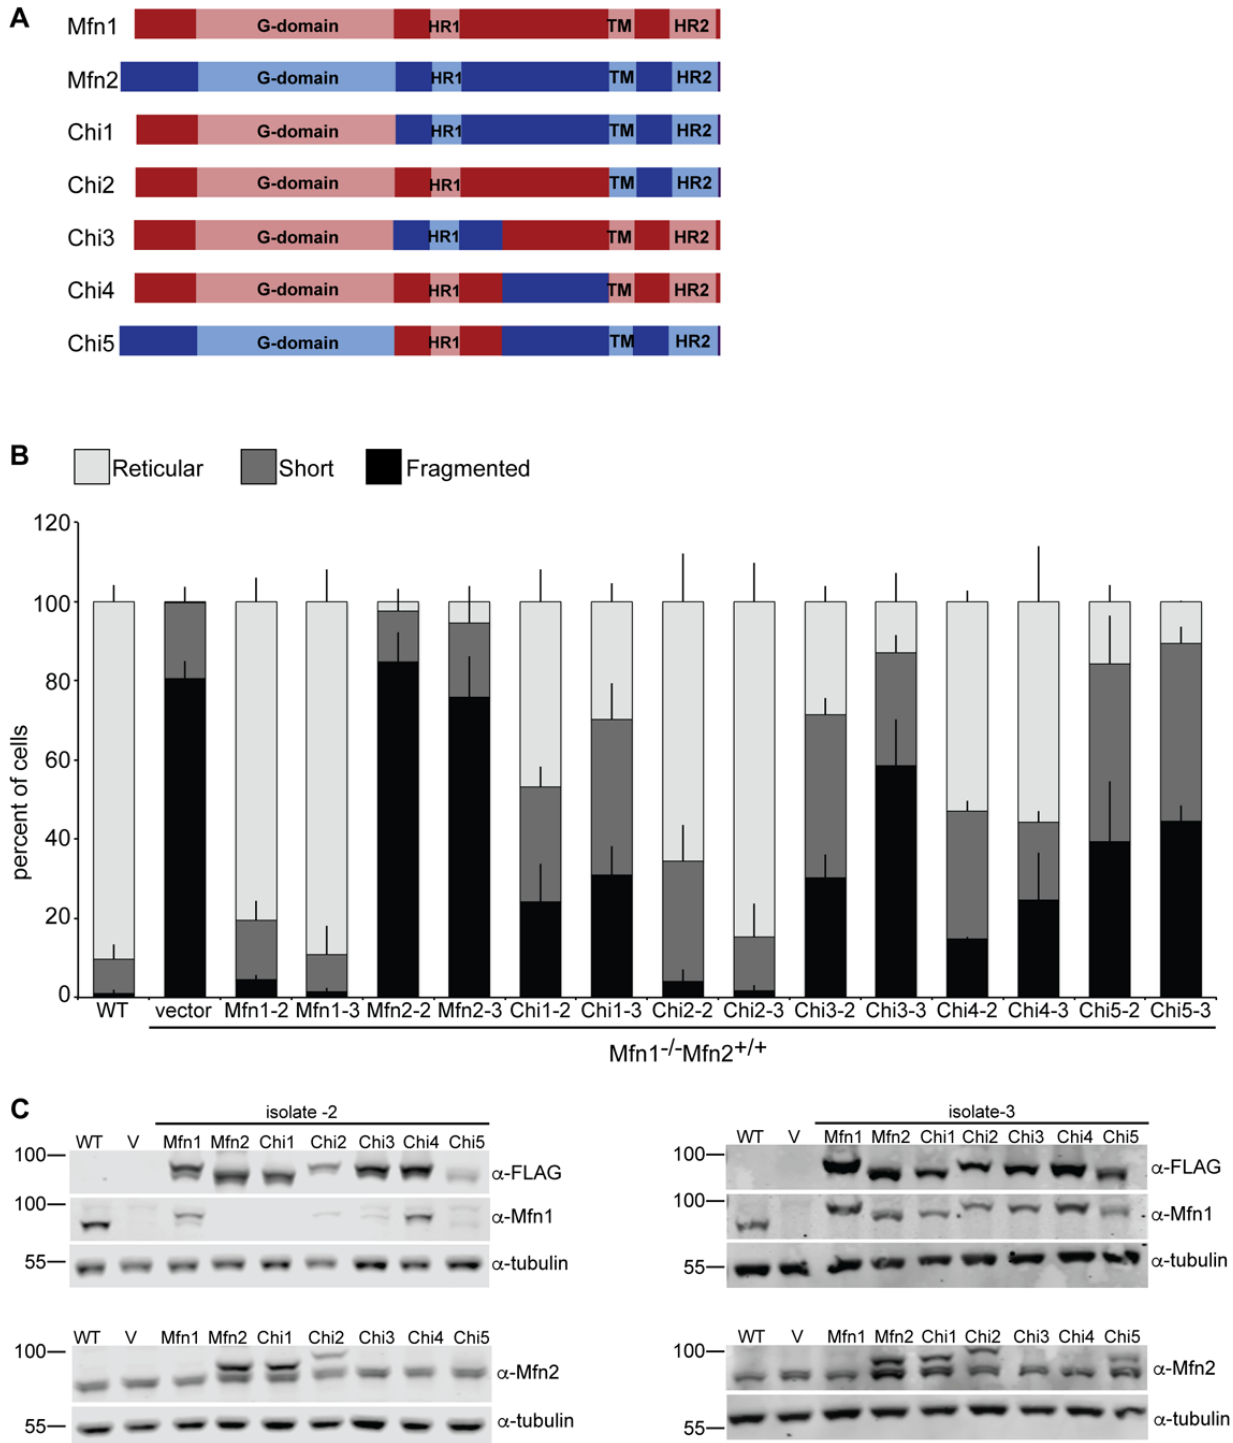

**Figure S2**

**Mfn1-dependent rescue of Mfn1-null cells by Chimera proteins. (A)**

Schematic representation of known functional domains in Mfn1 and Mfn2 and the chimeric proteins generated for this study. (B) Quantification of the mitochondrial

morphology in a clonal population of Mfn1-null cells expressing the indicated Mitofusin or chimeric protein (-2 and -3 indicate the second and third clonal populations, respectively). Error bars indicate mean + standard deviation from three blinded experiments ( $n \geq 100$  cells per population per experiment). (C) Whole cell lysates prepared from the indicated cell lines described in (B) were subjected to SDS-PAGE and immunoblotting with the indicated antibody.

**BDLP**  
BDLP  
MARF 1 MAAYLNRTISLVGTGQTPGSANDKNSTGNDTVDDSRHNISLQTSASSTSANMTGITDNRM  
Mfn1  
Mfn2 1 MSLLF.SRCNSIVTVKKDKRH

**BDLP**  $\alpha 1$   
BDLP 1 . MVNQVATDRFIVQDLERVAQVRSEMSVCLN[...KLAETINKAFLAGDSS.SGKLSLER  
MARF 61 YQPNKSPLOIFVRRAKKKIINDIYGEIEYVLETTTFITALHADAEIVDKAE...RELFEF  
Mfn1 1 .MAETVSPKHFVLAKKKAITAIFGQLEFVTEGSHFVEATYRNPBLDRIASEDDLVEIQG  
Mfn2 21 MAEVNASPLKHFVTAKKKIINGIFEQLGAYIQESASFLEDTHRNTBLDPPVTTEEQVLDVKG

**BDLP**  $\alpha 2$   $\beta 1$  G1/P-loop  $\alpha 3$  G2/switch 1  $\beta 2$   
BDLP 54 DIEDITIASKNIDQGGVFRLLVLCGDMKRRGKSTFLNALIGENLLPSDVNPFCAVLTIVLRVYGP  
MARF 118 YVHKVAAIREVLRQDRDHMKVAFFGRTSNGKSSVINAMLRKILPSGIGHTNCFCCVVEGS.  
Mfn1 60 YRNKLAVIGEVLSRRHMKVAFFGRTSSGKSSVINAMLRKILPSGIGHTNCFCLVVEGT.  
Mfn2 81 YLSKVRGIVSEVLRARRHMKVAFFGRTSNGKSTVINAMLRKILPSGIGHTNCFCLRVEGCT.

**BDLP**  $\beta 3$   $\alpha 4$   $\eta 1$   $\beta 4$   $\alpha 5$   
BDLP 114 EKKVTHIFNDCKSPQLDFQNFKYKYTIDPAEAKKIQEQEKQAFAPDVDAVVEYPLTL  
MARF 177 DGGEAYLMKESDEKLNVTNINIK...QLANAMCOE.KLSESSLVRIFWPRERCSLL  
Mfn1 119 DGDKAYLMTESDEKKSVKTVN...QLAHAMHMDKDLKAGCLVHVFVWPKAKCALL  
Mfn2 140 DGEAFLLESEEEKKSVKTVN...QLAHAMHODEQLHAGSMVSVMWPNKCALL

**BDLP** G3/switch 2  $\beta 5$   $\alpha 6$   $\eta 2$   $\beta 6$   $\alpha 7$   
BDLP 173 QKGIETVDSPLNDTEARNELESLGYNCHAILFVNRASQPCITLGERRYLENYI.KGRGL  
MARF 228 RDDVVFVDSPLVDVSNLDDWIDNHICINADVFLVLANAESTMTRAKQFFHVSQKLSKP  
Mfn1 171 RDDLVLVDSPLVDVTTELDLWIDKFLDADVFLVANSESTLMNTSKHFFHKVNERLSKP  
Mfn2 192 RDDLVLMDSPLVDVTTELDLWIDKFLDADVFLVANSESTLMQTSKQFFHVSERLSRP

**BDLP** G4  $\beta 7$   $\eta 3$   $\alpha 8$   $\eta 4$   $\beta 8$   $\beta 9$   $\eta 5$   $\beta 10$   
BDLP 232 TVFFLVNANDQVRESLIDPDVVEELQASENRLRQVFNANLAEYCTVEGQNIYDERVFEELS  
MARF 288 NIFILNRRWDASAN...EPEFQESVKSQHTERC...IDFTEKELKVSNEKEAAERVFFVVS  
Mfn1 231 NIFILNRRWDASAS...EPEYMEDVRRQHMER...LHFVVEELVWVSPSEARNRFFVVS  
Mfn2 252 NIFILNRRWDASAS...EPEYMEVRRQHMER...TSFVDEELGVVDRAQAGDRIFVVS

**BDLP**  $\alpha 9$   $\beta 11$   $\alpha 10$   
BDLP 292 SIQAARRRLKNPQADLDGTGFPF.KFMDSLNTFTITRERATAEL...[...]  
MARF 342 ARETQARIEEAKGNPPHMCAIAEGFQIRYEFQDFERKFEECISQSAVTKKFQHSRRG  
Mfn1 285 AKEVLSARVQKAOGMPEGGCALAEGFQARLQEFQNFQTFEECISQSAVTKKFQHTIRA  
Mfn2 306 AKEVLSARVQKAOGMPEGGCALAEGFQVRMFEFQNFQTFEECISQSAVTKKFQHTVRA

MISR

**BDLP**  $\alpha 11$   
BDLP 333 [..RQVRTLARLACNHTREAVARRIPPLEQDVNECLKKRIDSVEPEFNKL  
MARF 402 KSVSGDMRSMLDNIFERITFRDLKQDKKNLLTERIQGTEQMMQV...  
Mfn1 345 KQILDVKNILDSVNVAAEKRVVYSMEEREQIDRLDFIRNQMNL...  
Mfn2 366 KQIAEAVRLIMDSLHIAAQEQRVYCLEMREERQDRRLRFIDKQLEL...

MISR

**BDLP**  $\alpha 12$   $\alpha 13$   
BDLP 379 TGIRDEFQKEITINTRTQARTISESFRSYVNLNGNTFENDFLRVQPELNLFDFLSSGKRE  
MARF 448 .TREMKKMTHNMVEEVEEKVSKALNEEIWRGLGVLDDEFNMPHFBERLVLNIIYKKEINA  
Mfn1 391 .TLDVKKKIKEVTVEEVANKVSCAMTDEICRLSVLVDEFCSFHFETPSVLKVVYKSELNK  
Mfn2 412 .AQDYKLRKQITVEEVERQVSTAMAEERRLISVLVDEYQMDFFHSPVVLKVVYKNEIHR

MISR

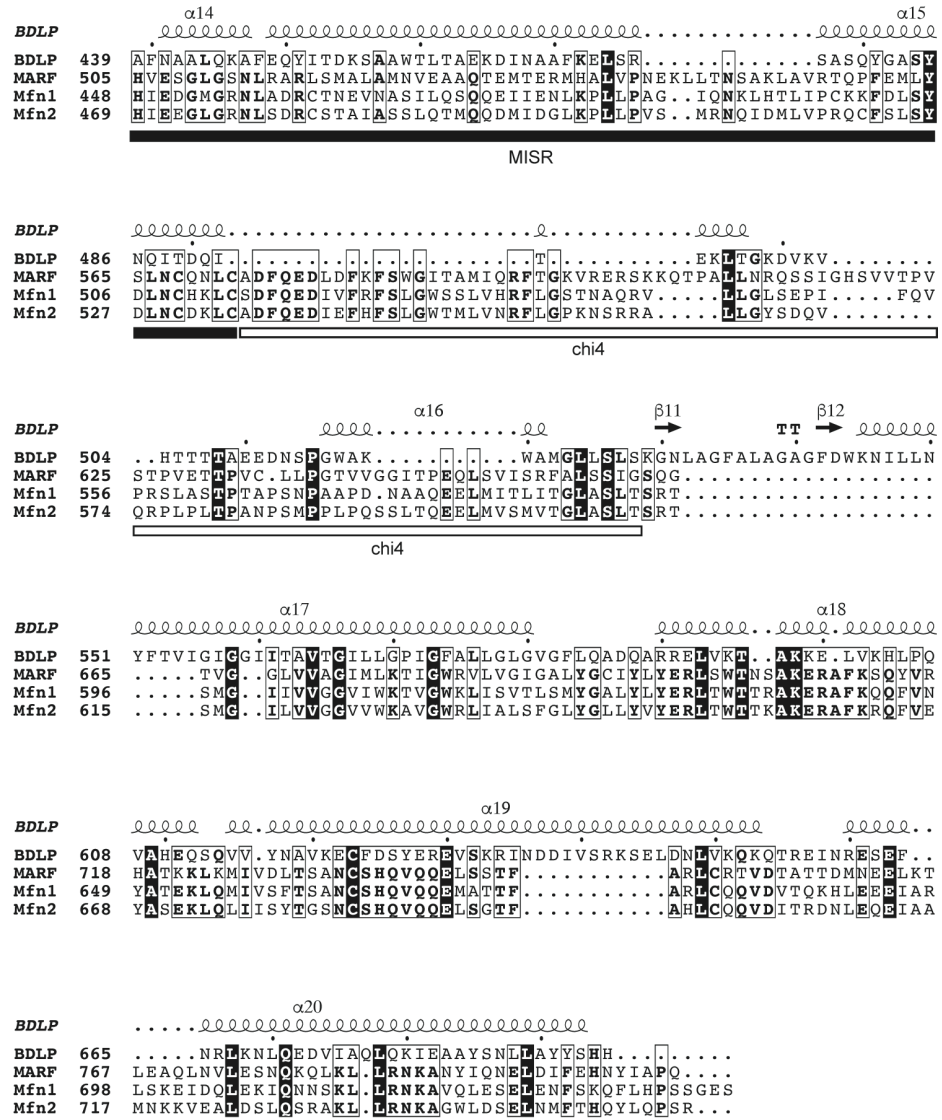

**Figure S3**

**Sequence alignment of BDLP, MARF and the mouse Mitofusin proteins.**

Amino acid sequences of BDLP (B2IZD3), MARF (Q7YU24), Mfn1 (Q811U4) and Mfn2 (Q80U63) were aligned with Clustal Omega. The structural features of BDLP PDB 2J68 are shown: alpha helices are indicated with spirals and beta sheets with arrows. The graphic was generated by ESPript (Robert and Gouet, 2014). The G1-G4 elements are specified above the sequence. MISR and the Chi5 regions are identified below the sequence.

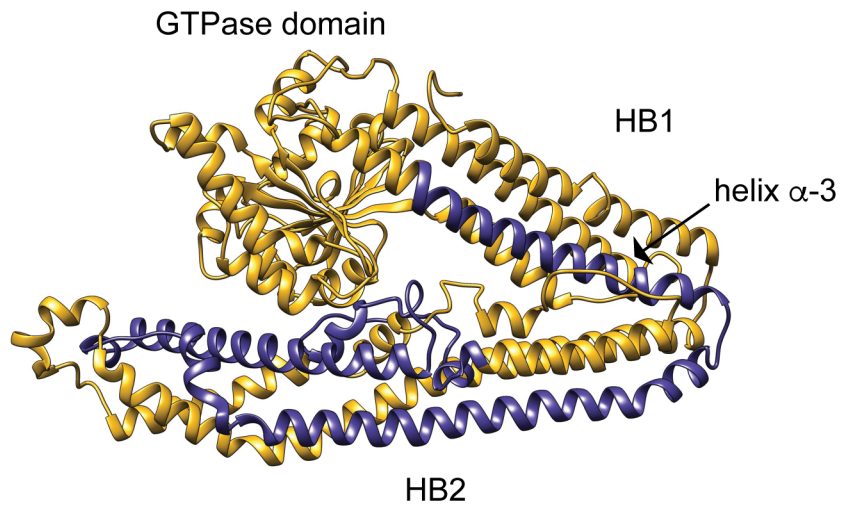

**Figure S4**

**BDLP structure as a model for Mitofusin structure.**

A homology model of Mfn1 generated by Phyre2 utilizing PDB 2J68 (Kelley et al., 2015). MISR is highlighted in purple and includes helix  $\alpha$ -3 in HB1 of the internally truncated Mfn1 structure (Cao et al., 2017, Qi et al., 2016, Yan et al., 2018) as well as predicted helices and loops in the uncharacterized HB2.

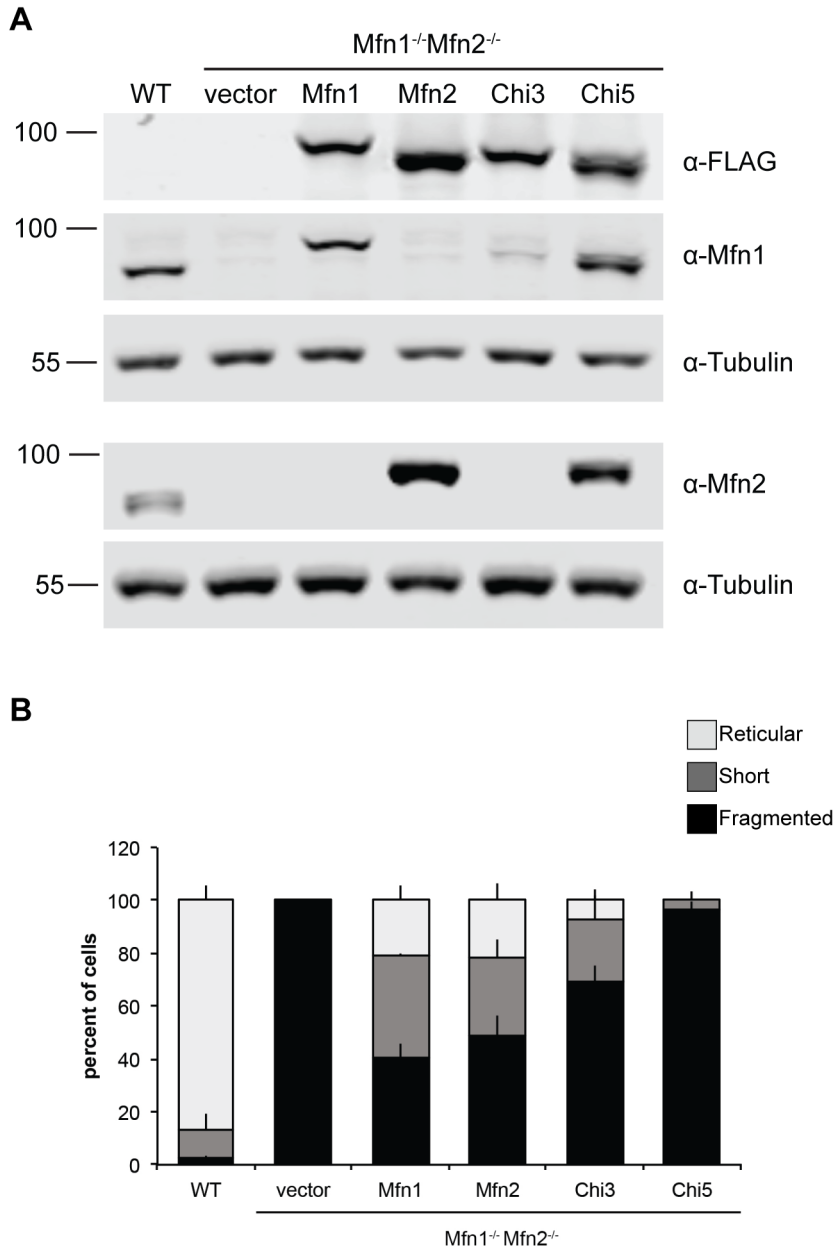

**Figure S5**

**Mitofusin-FLAG protein expression in clonal populations of  $Mfn1/2$ -null cells.**

(A) Whole cell lysates prepared from the indicated cell lines were subjected to SDS-PAGE and immunoblotting with the indicated antibody. (B) Quantification of the mitochondrial morphology in a clonal population of  $Mfn1/2$ -null cells expressing the indicated Mitofusin or Chimeric protein.



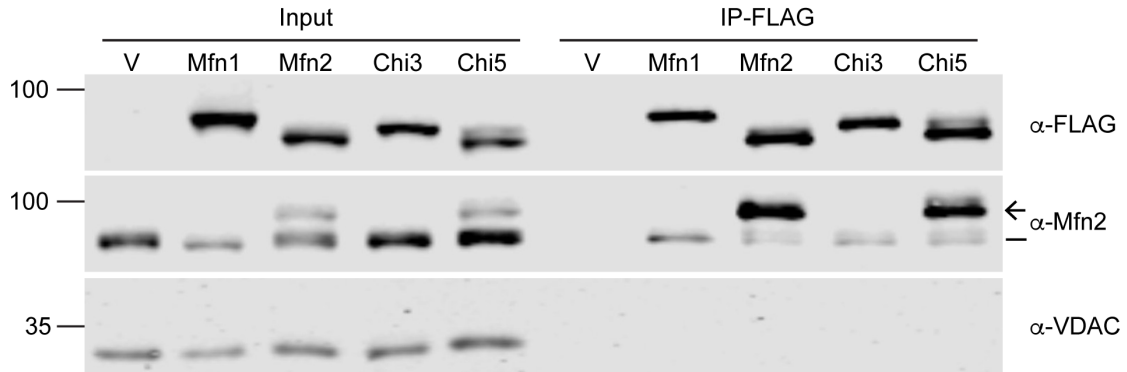

**Figure S6**

**Co-immunoprecipitation of Mitofusin-FLAG and endogenous Mfn2.**

Immunoprecipitations were performed with anti-FLAG magnetic beads on 100  $\mu$ g of mitochondria isolated from Mfn1-null cells expressing the indicated Mitofusin-FLAG. Samples were analyzed by SDS-PAGE and Western blot with the indicated antibodies. For  $\alpha$ -Mfn2, the line indicates the endogenous protein and the arrow indicates the FLAG-tagged variant. Input represents 2.5% of the total lysate and IP-FLAG represents 50% of the immunoprecipitated protein.

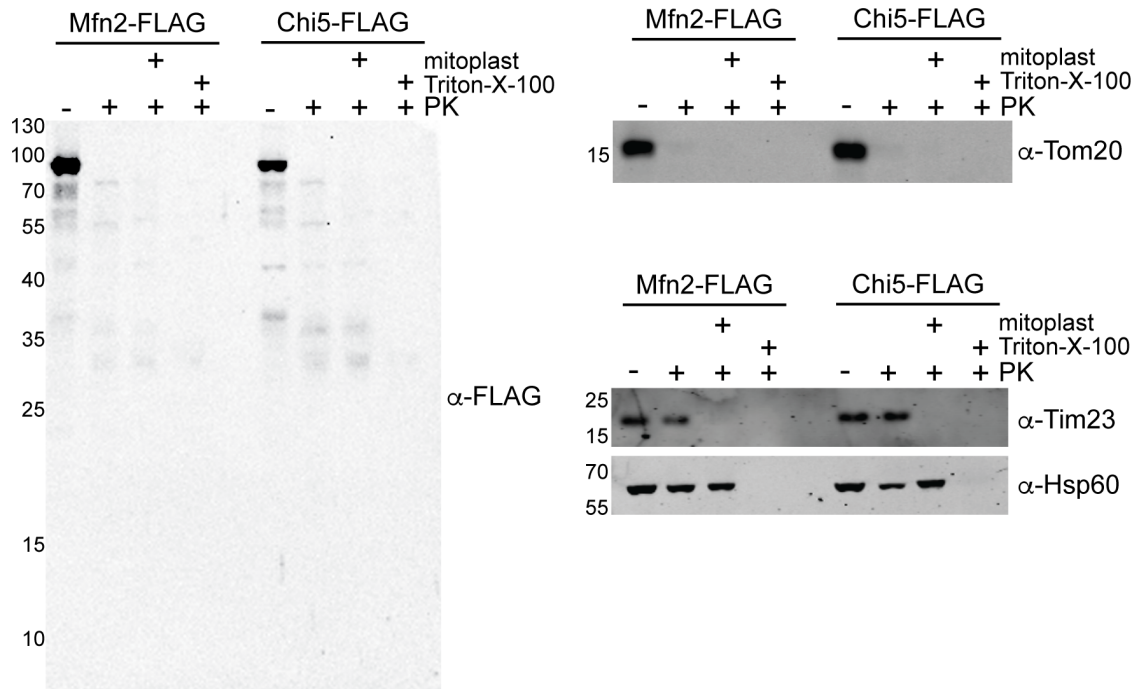

**Figure S7**

**Protease protection of Mfn2 and Chi5.**

Mitochondria were isolated from Mfn1-null cells expressing either Mfn2-FLAG or Chi5-FLAG, as described in Fig. 1 and Fig. S1. Mitochondria were left intact, converted to mitoplasts or solubilized with Triton-X-100 before treatment with (+) or without proteinase K (PK). Following treatment, samples were analyzed by SDS-PAGE and Western blot analysis against the indicated proteins. Tom20 represents a mitochondrial outer membrane marker; Tim23 represents a mitochondrial inner membrane marker; Hsp60 represents a mitochondrial matrix marker.
